# Supplementary material for: A colorful approach towards developing new nano-based imaging contrast agents for improved cancer detection
Source: Royal Society of Chemistry journal article supplement (doi:10.1039/d0bm01099e), 2020-08-19
Supplement: d0bm01099e1.pdf [file d0bm01099e1.pdf]

## Electronic Supplementary Information

### A Colorful Approach Towards Developing New Nano-based Imaging Contrast Agents for Improved Cancer Detection

**Helen R. Salinas<sup>1,†</sup>, Dominie L. Miyasato<sup>1,†</sup>, Olga E. Eremina<sup>1,†</sup>, Rodolfo Perez<sup>1</sup>, Karen L. Gonzalez<sup>1</sup>, Alexander T. Czaja<sup>1</sup>, Sean Burkitt<sup>1</sup>, Arjun Aron<sup>1</sup>, Augusta Fernando<sup>1</sup>, Lauro S. Ojeda<sup>1</sup>, Kimberly Larson<sup>1</sup>, Ahmed W. Mohamed<sup>1</sup>, Jos L. Campbell<sup>1</sup>, Beth A. Goins<sup>2</sup>, Cristina Zavaleta<sup>1,\*</sup>**

<sup>1</sup> Department of Biomedical Engineering, University of Southern California, 1002 Child's Way, Los Angeles, CA 90089, United States.

<sup>2</sup> Department of Radiology, University of Texas Health Science Center, 7703 Floyd Curl Dr. San Antonio, TX 78229, United States.

\* Correspondence: Cristina Zavaleta, czavalet@usc.edu; Tel.: +01-213-764-7999

† These authors contributed equally to this work.

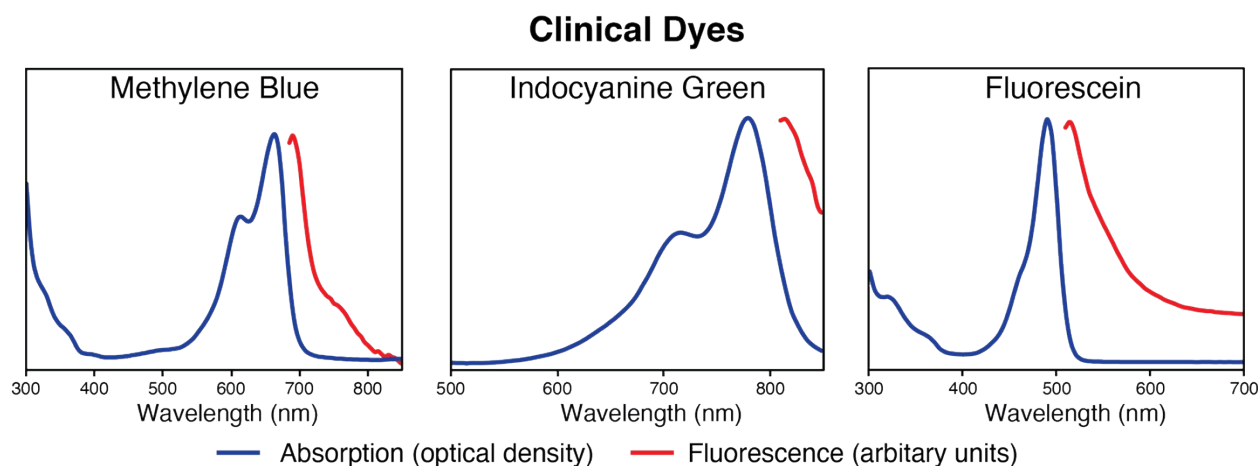

**Figure S1.** Absorption and fluorescence spectra of clinical dyes (Methylene Blue in H<sub>2</sub>O; Indocyanine Green in DMSO; Fluorescein in 0.5 M NaOH).

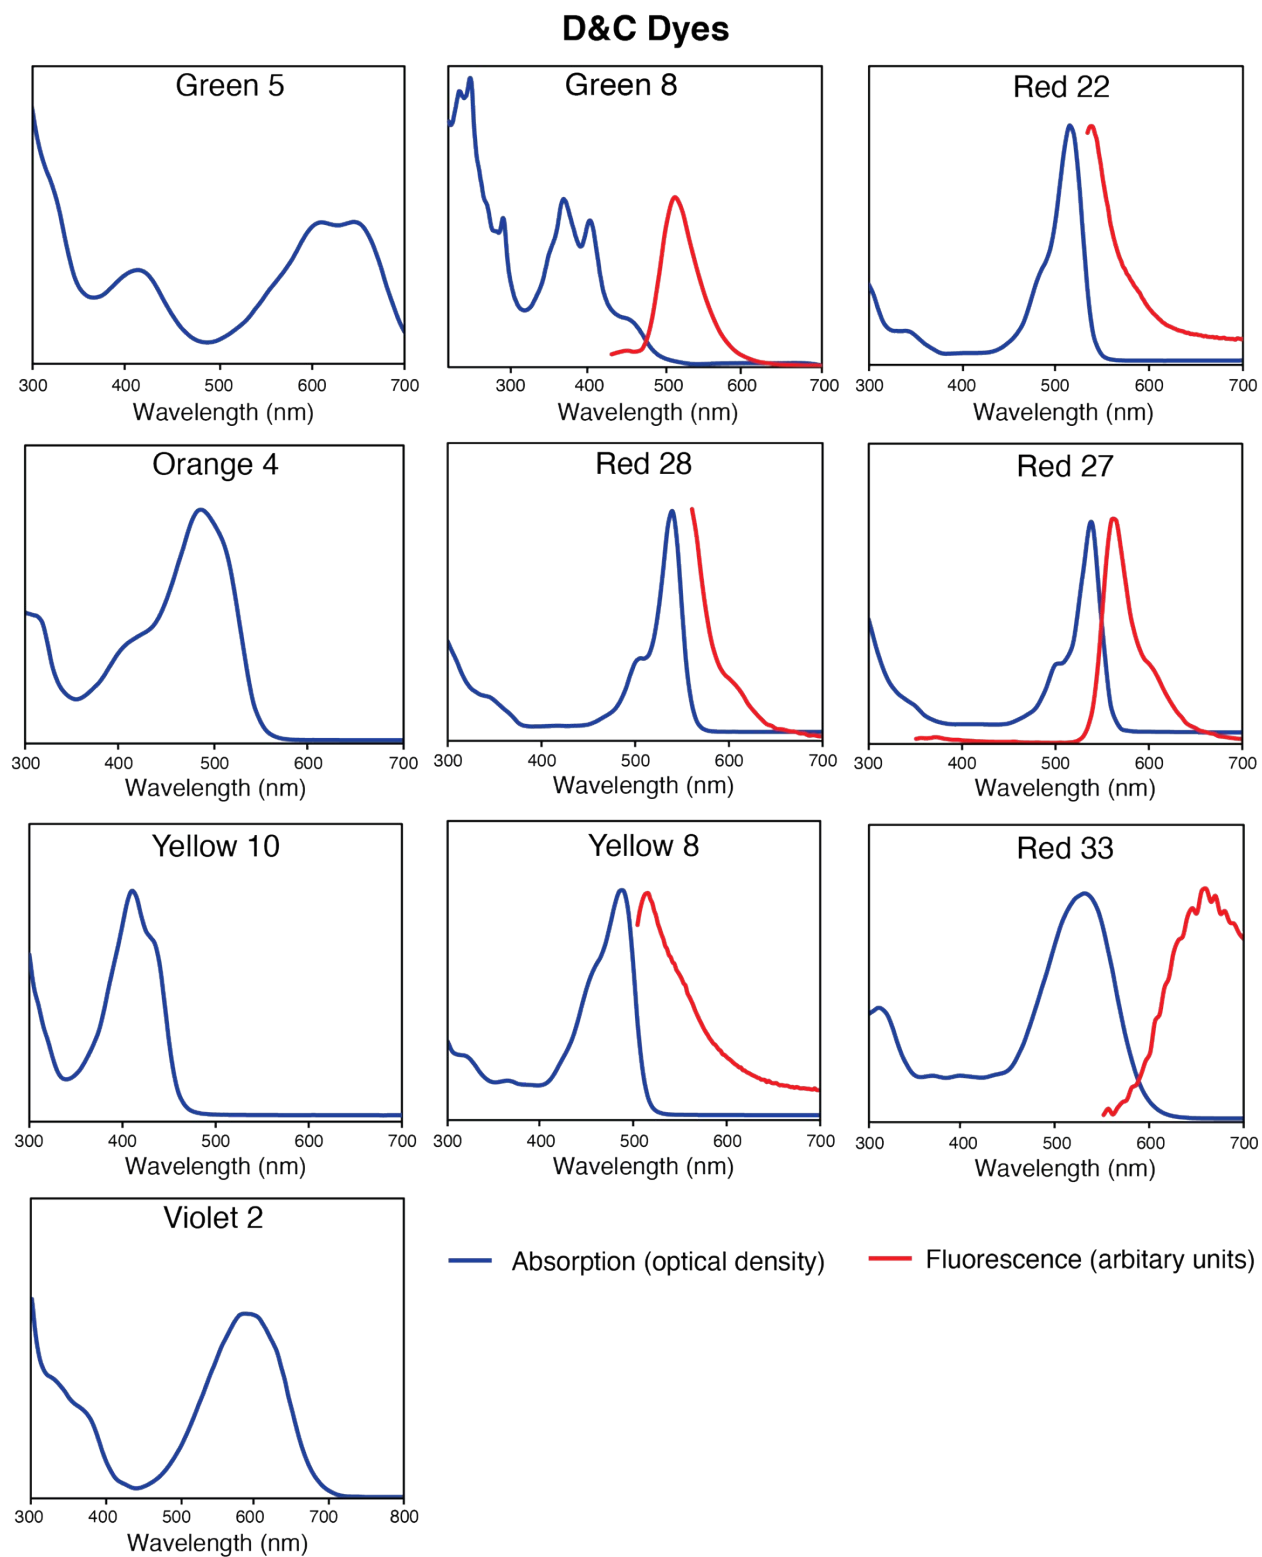

**Figure S2.** Absorption and fluorescence spectra of D&C dyes (Green 5, Green 8, Red 22, Orange 4, Red 28, Yellow 10, and Red 33 in H<sub>2</sub>O; Red 27 and Violet 2 in DMSO).

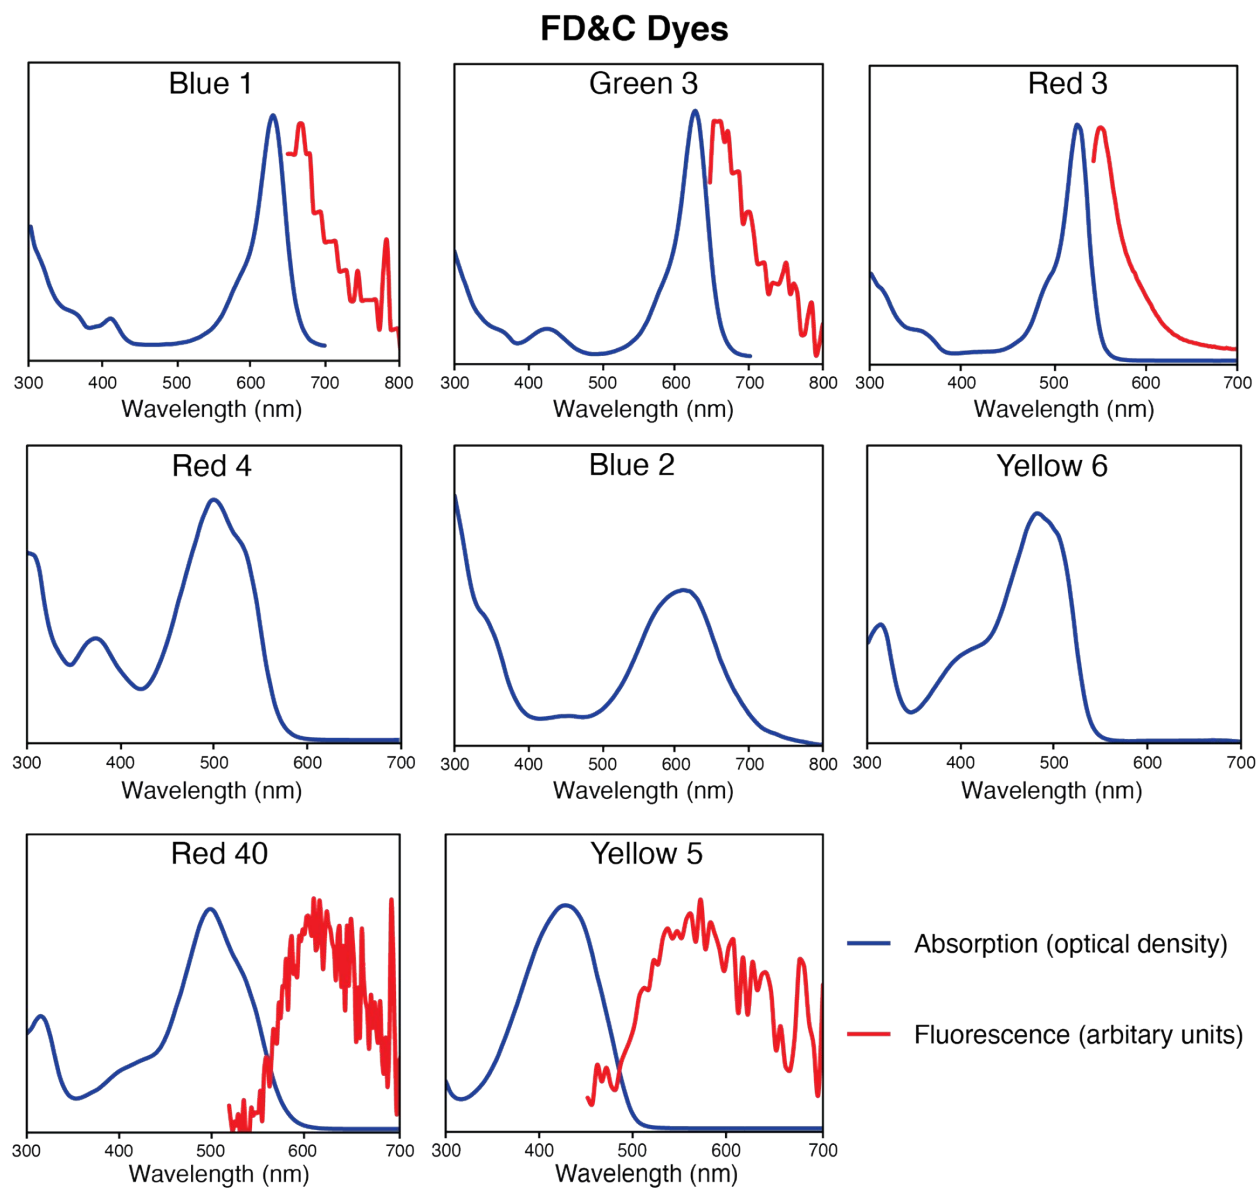

**Figure S3.** Absorption and fluorescence spectra of FD&C dyes (Blue 1, Red 3, Red 4, Yellow 6, Red 40, and Yellow 5 in H<sub>2</sub>O; Blue 2 in DMSO).

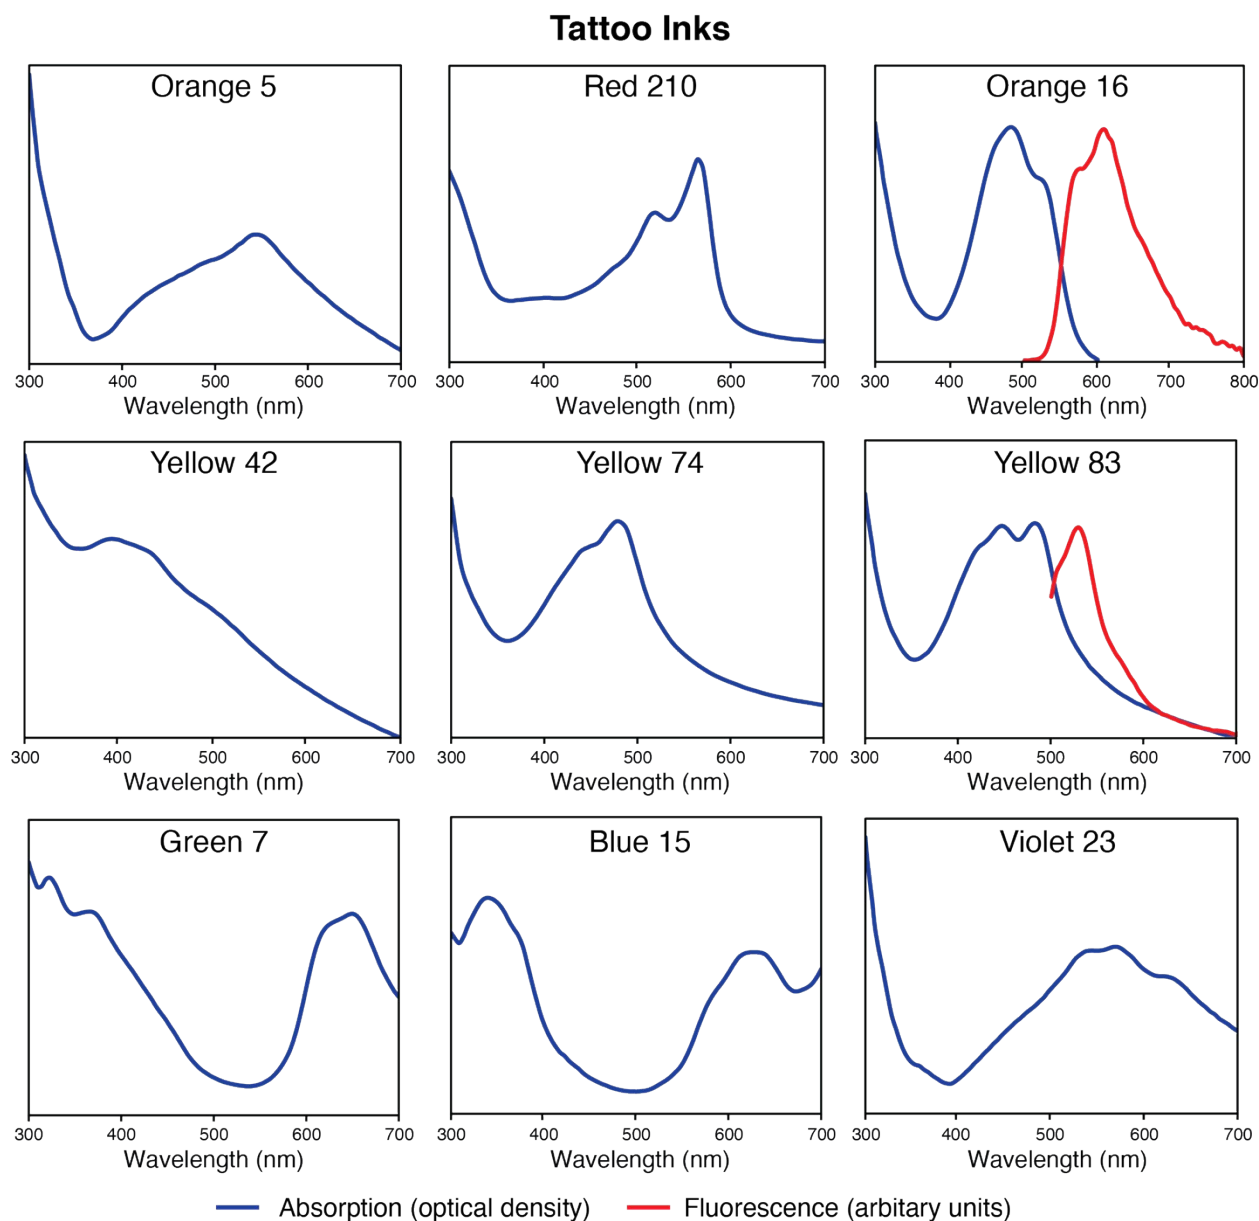

**Figure S4.** Absorption and fluorescence spectra of tattoo inks (all tattoo inks were dissolved in H<sub>2</sub>O).

Furthermore, fluorescence efficiency for the best-performing dyes was compared in PBS solution with pH 7.4. As some of the clinical dyes (Fluorescein and Indocyanine Green) and Red 27 are insoluble in water, initial solution of Fluorescein was prepared in 0.1 M NaOH; Red 27 and Indocyanine Green – in DMSO, and then these solutions were diluted at least 10 times with PBS.

Quantum yield, i.e. the efficiency of converting absorbed light into emitted light, for each dye was calculated by the most frequently and most reliable comparative method described by Williams et al.,<sup>1</sup> which involves the use of well characterized standard samples with known  $\phi$ -values. Fluorescein solution was chosen as a standard sample.<sup>2</sup>

$$\phi = \phi_{FL} \cdot \frac{F}{F_{FL}} \cdot \frac{A_{FL}}{A} \cdot \left( \frac{n_{FL}}{n} \right)^2$$

where  $\phi$  and  $\phi_{FL}$  – quantum yields for the investigated dye and fluorescein, respectively;  
 $F$  and  $F_{FL}$  – fluorescence intensities for the investigated dye and fluorescein, respectively;  
 $A$  and  $A_{FL}$  – absorbance at excitation wavelength for the investigated dye and fluorescein, respectively;  
 $n$  and  $n_{FL}$  – refractive index of the solvent used for the investigated dye and fluorescein solution, respectively ( $n_{H_2O} = 1.333$  and  $n_{EtOH} = 1.36$ ).

**Table S1.** Fluorescence properties for the best-performing investigated dyes in different media.

| Dye                     | Solvent                         | $\lambda_{ex}$ , nm | $\lambda_{em}$ , nm | Quantum yield      |
|-------------------------|---------------------------------|---------------------|---------------------|--------------------|
| Fluorescein (FL)        | EtOH                            | 485                 | 521                 | 0.95 <sup>2</sup>  |
|                         | PBS                             | 485                 | 515                 | 0.86               |
|                         | 1 M NaOH                        | 485                 | 515                 | 0.92 <sup>3</sup>  |
| Red 22 (R22)            | PBS                             | 515                 | 538                 | 0.63               |
|                         | H <sub>2</sub> O                | 515                 | 538                 | 0.68               |
| Red 28 (R28)            | PBS                             | 540                 | 600                 | 0.53               |
|                         | H <sub>2</sub> O                | 540                 | 600                 | 0.41               |
| Red 3 (R3)              | PBS                             | 525                 | 549                 | 0.08               |
|                         | H <sub>2</sub> O                | 525                 | 549                 | 0.07               |
| Red 27 (R27)            | PBS                             | 540                 | 610                 | 0.15               |
|                         | EtOH                            | 555                 | 620                 | 0.42               |
|                         | H <sub>2</sub> O                | 540                 | 610                 | 0.15               |
| Green 8 (G8)            | PBS                             | 455                 | 515                 | 0.34               |
|                         | 0.5 M NaOH                      | 455                 | 515                 | 0.35               |
| Orange 16 (O16)         | PBS                             | 480                 | 617                 | 0.014              |
|                         | H <sub>2</sub> O                | 480                 | 617                 | 0.016              |
| Methylene Blue (MB)     | PBS                             | 600                 | 685                 | 0.016              |
|                         | CH <sub>2</sub> Cl <sub>2</sub> | 664                 | 690                 | 0.52 <sup>4</sup>  |
| Indocyanine Green (ICG) | PBS                             | 785                 | 815                 | 0.027 <sup>5</sup> |
|                         | EtOH/H <sub>2</sub> O           | 785                 | 815                 | 0.084 <sup>5</sup> |

## References:

1. A. T. R. Williams, S. A. Winfield and J. N. Miller, *Analyst*, 1983, **108**, 1067-1071.
2. X.-F. Zhang, J. Zhang and Limin Liu, *J Fluoresc*, 2014, **24**, 819-826.
3. D. Magde, R. Wong and P. G. Seybold, *Photochem Photobiol*, 2002, **75**, 327-334.
4. M. Mirenda, C. A. Strassert, L. E. Dicelio and E. S. Román, *ACS Appl Mater Interfaces*, 2010, **2**, 1556-1560.
5. T. J. Russin, E. İ. Altinoğlu, J. H. Adair and P. C. Eklund, *J Phys Condens Matter*, 2010, **22**, 334217.

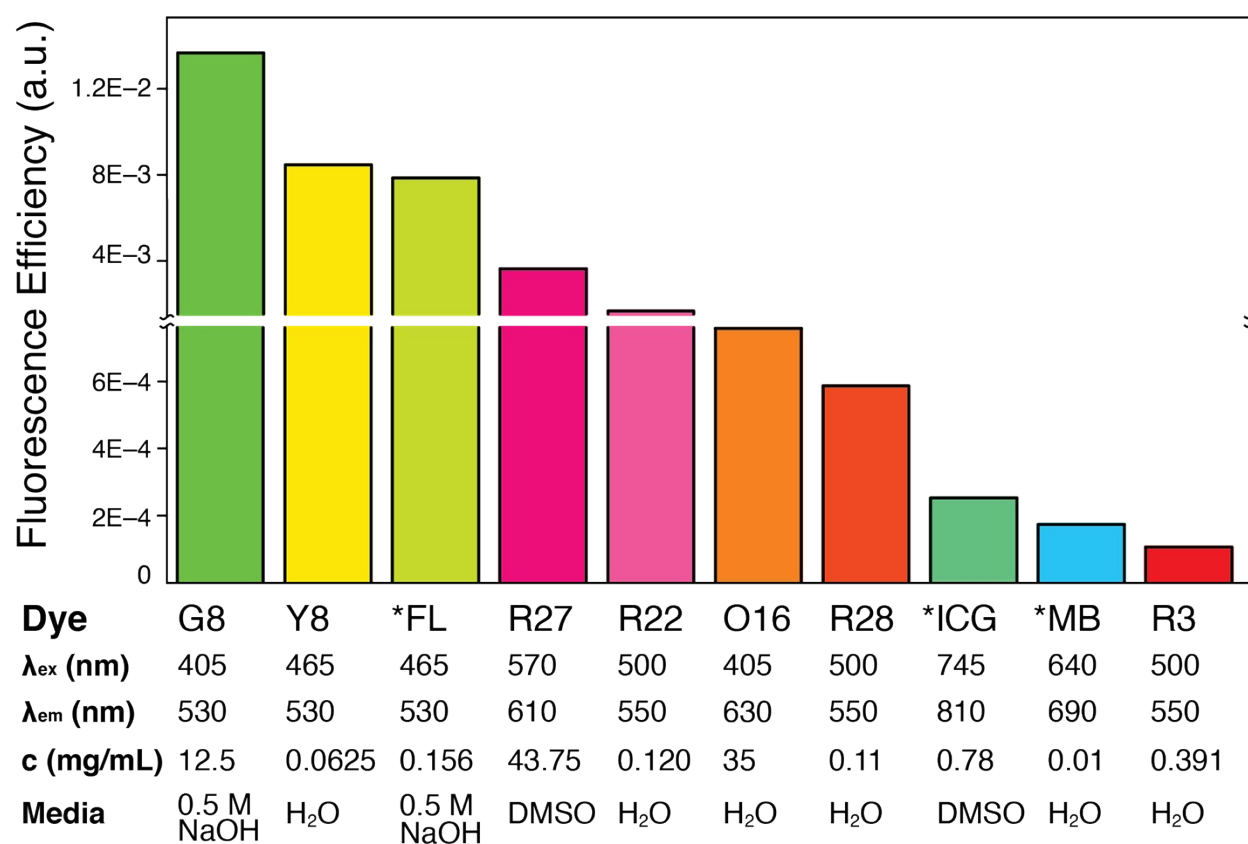

**Fig. S5.** Fluorescence efficiency of the best-performing dyes and pigments using their optimal concentrations, solvent, and filter settings to evaluate maximum fluorescence potential (\*denotes the clinically approved dyes). Fluorescence efficiency is defined here as the amount of fluorescence emission signal divided by the incident fluorescence excitation signal (theoretical maximum ratio of one and is therefore unitless).

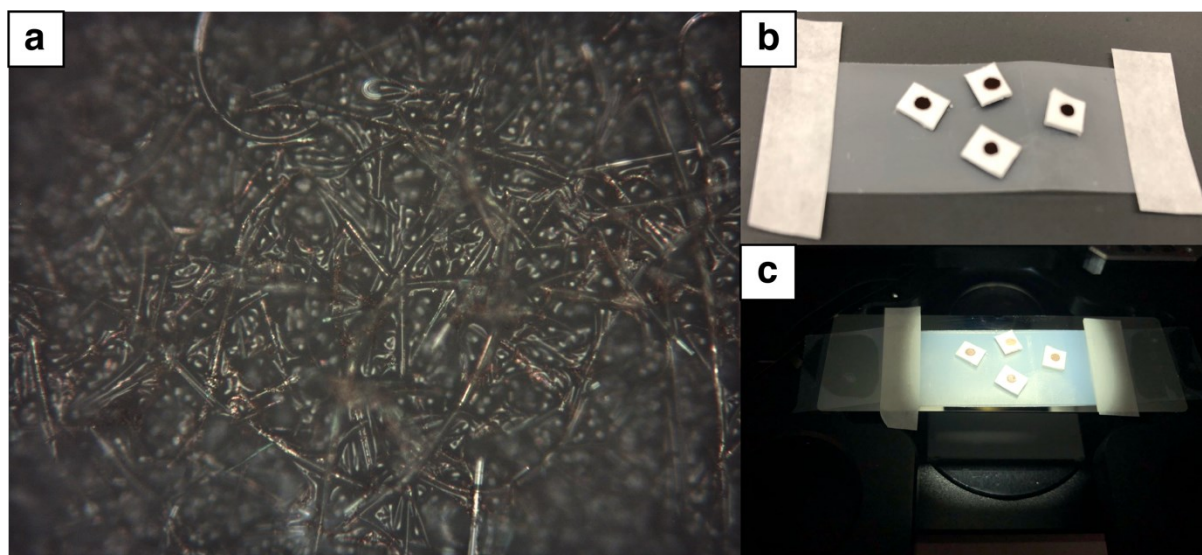

**Figure S6.** (a) Microphotograph of quartz paper with 10 nM AuNPs colloid before SERS measurements; (b) photographs of quartz paper before applying Green 8 or Orange 16 solution on the surface and (c) after applying Green 8 or Orange 16 solution before the SERS measurement.

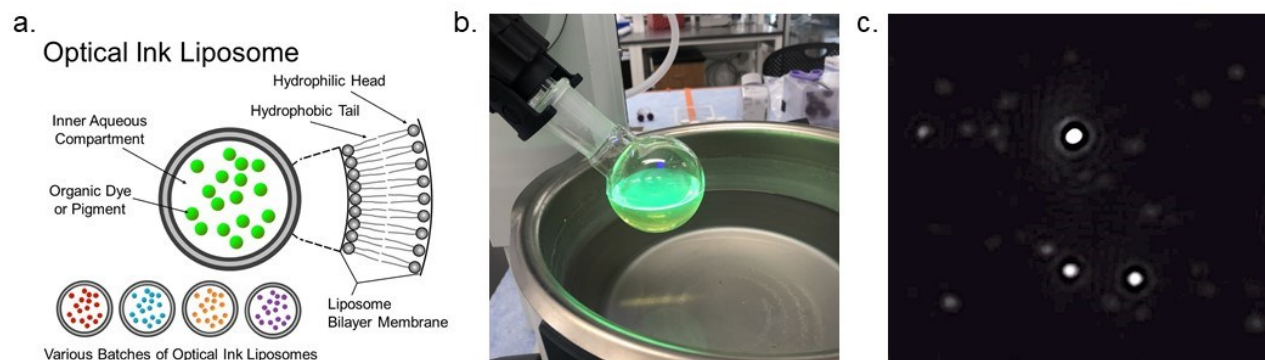

**Figure S7.** (a) Nanoparticle schematic of our liposomes; (b) Fluorescence generation from FDA approved drug and cosmetic dye G8 used in our liposomal nanoparticle formulation; (c) Nanoparticle tracking analysis (NTA) image of our 180 nm liposomes encapsulated with G8 dye used in this the study.



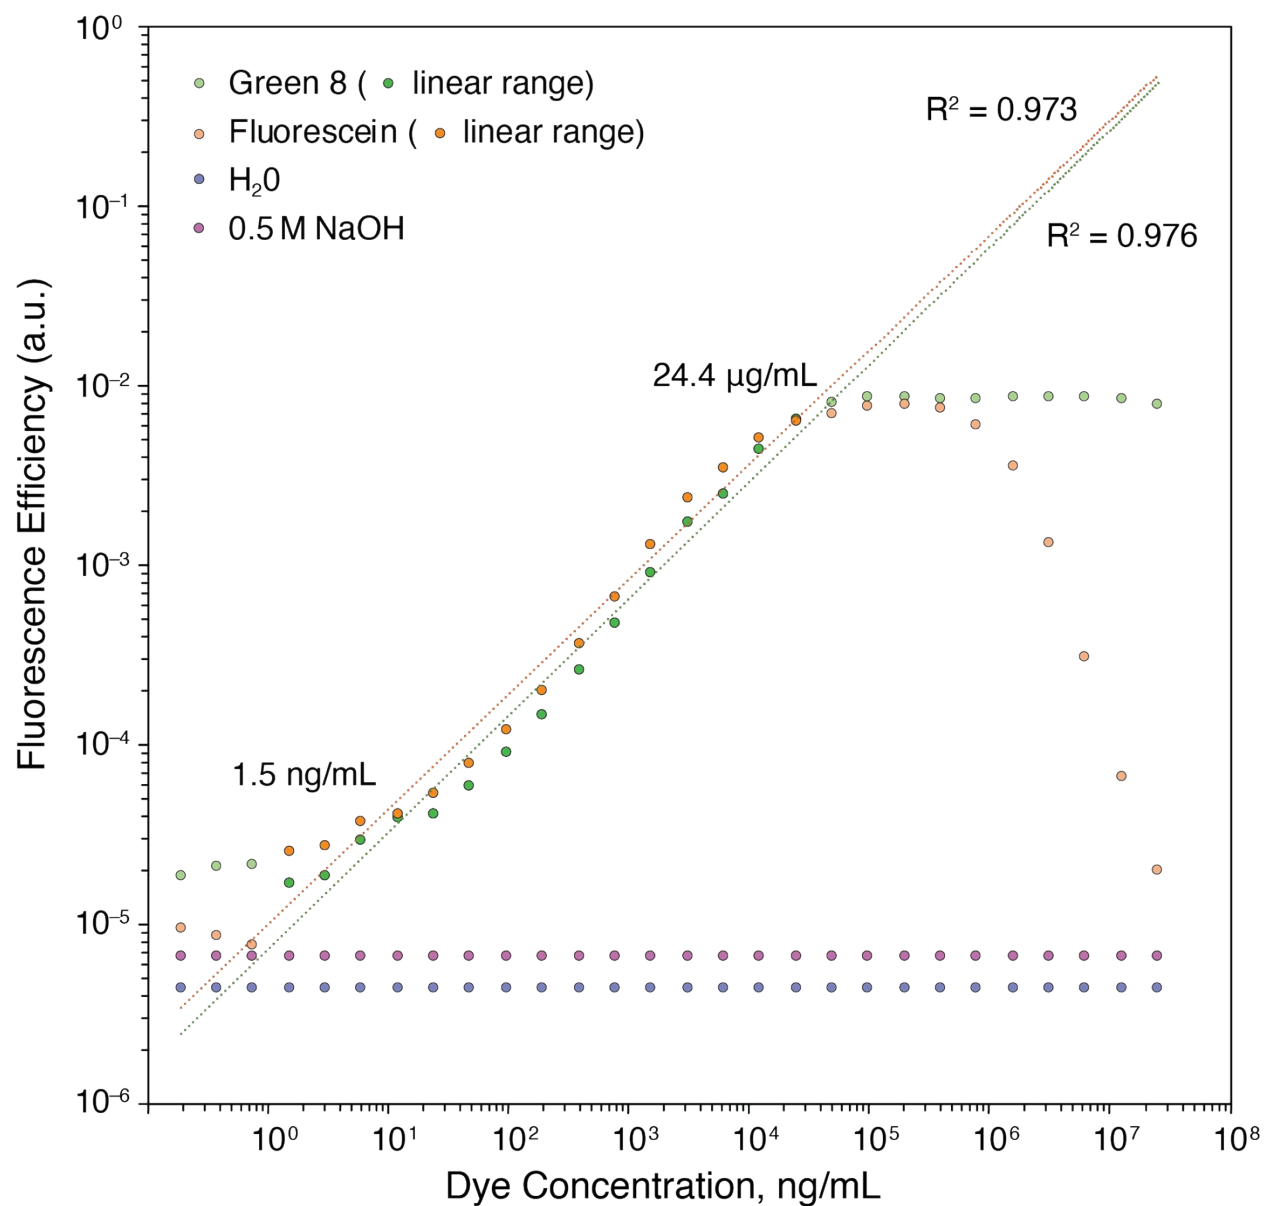

**Figure S8.** Linear Dynamic Range of G8 dye and fluorescein dye. Both dyes exhibit the same linear dynamic range from 1.5 ng/ml to 24.4  $\mu\text{g/ml}$ . Notice how the fluorescence signal for G8 plateaus at higher concentrations and the fluorescent signal for fluorescein drops off at higher concentrations.

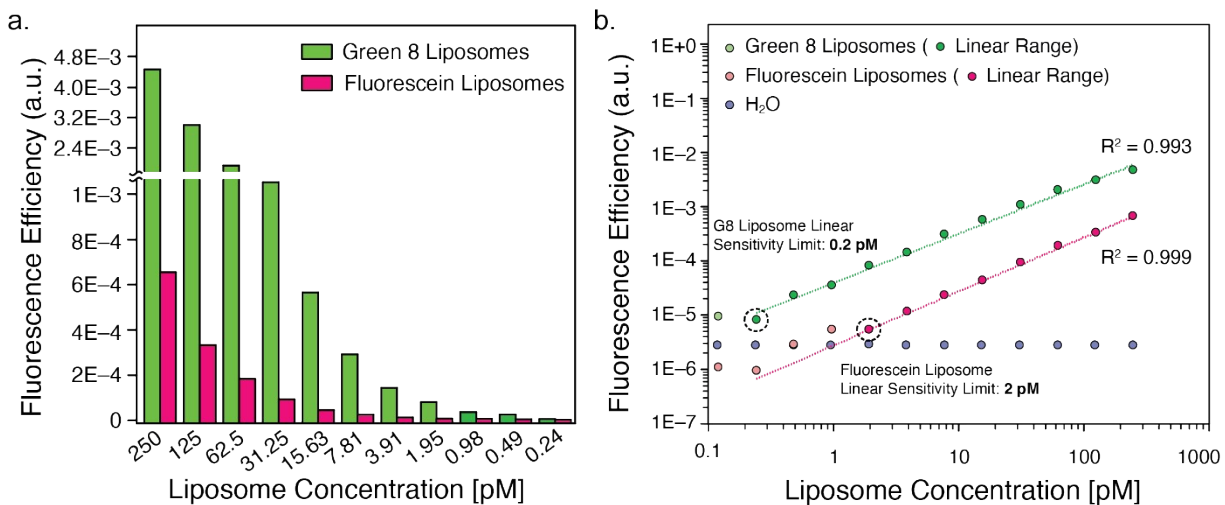

**Figure S9.** Fluorescence sensitivity of G8-liposomes and FL-liposomes. (a) Fluorescence efficiency of G8-liposomes compared with FL-liposomes (b) Linear sensitivity plot for both liposome batches. Notice the linear sensitivity limit of G8 dye is 0.2 pM whereas the linear sensitivity limit for FL-liposomes is 2 pM. Both dyes exhibit strong fluorescent signal for imaging, but the G8-liposomes are more sensitive.

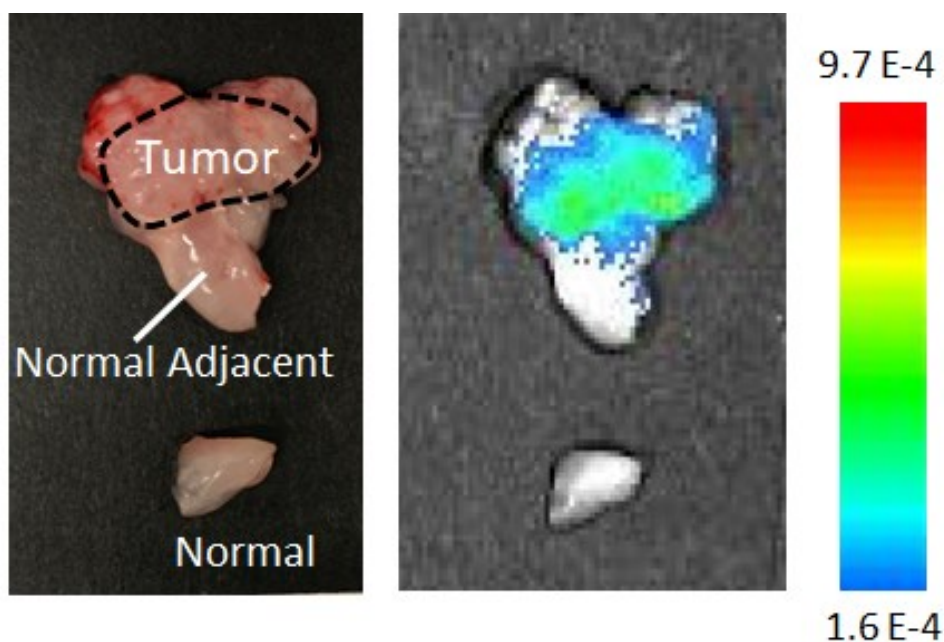

**Figure S10.** LS174T tumor retaining 180 nm liposomes surrounded by healthy adjacent tissue. Color bars represents fluorescence efficiency which is defined here as the amount of fluorescence emission signal divided by the incident fluorescence excitation signal. So the maximum theoretical number would be 1 and is therefore unitless.

**Table S2.**

| <b>Figure 5</b> | <b>Tumor to Adj. Tissue Ratio</b> | <b>Tumor to Control Ratio</b> |
|-----------------|-----------------------------------|-------------------------------|
| LS174T          | 22.46                             | 17.25                         |
| HeLa            | 22.08                             | 17.00                         |

| <b>Figure 6</b> | <b>Tumor to Adj. Tissue Ratio</b> | <b>Tumor to Control Ratio</b> |
|-----------------|-----------------------------------|-------------------------------|
| 180 nm          | 4.00                              | 9.41                          |
| 360 nm          | 4.39                              | 1.56                          |

| <b>Figure 7</b> | <b>Tumor to Adj. Tissue Ratio</b> | <b>Tumor to Control Ratio</b> |
|-----------------|-----------------------------------|-------------------------------|
| O16 Liposomes   | 8.15                              | 4.91                          |
| O16 Free Dye    | 2.62                              | 1.12                          |

**Video S1.** Live surgical resection of fluorescent LS174T tumor from adjacent normal tissue (dark background). Mouse was IV injected with G8-liposomes and euthanized 4 hr. post injection. Notice how the adjacent tissue does not show significant autofluorescence as compared to the neighboring tumor tissue, and the tumor is easily visualized with fluorescence image guidance.

**Video S2.** Intravital multiphoton imaging of our newly fabricated G8-liposomes flowing through the vasculature of a living mouse in real-time at 30 frames per second.
